# Supplementary material
Source: MDPI journal article supplement (https://www.mdpi.com/1999-4907/11/12/1354)
Supplement: s1 [file s1]

**Table S1.** Overview of climate variables and their correlation with the environmental principal components (PCs)

| Climate variable                                                                                                                          | PC1          | PC2          | PC3          |
|-------------------------------------------------------------------------------------------------------------------------------------------|--------------|--------------|--------------|
| Soil moisture at 10 cm below surface                                                                                                      | <b>-0.77</b> | <b>-0.29</b> | 0.23         |
| Air temperature 10 cm above surface within the ground vegetation layer                                                                    | <b>0.90</b>  | -0.02        | 0.10         |
| Air temperature at 2 m above ground (Ta_200)                                                                                              | <b>0.94</b>  | 0.01         | -0.03        |
| Cold days (Tmin < 0 °C of Ta_200)                                                                                                         | <b>-0.75</b> | <b>-0.31</b> | <b>0.29</b>  |
| Cool days (Tmax < 10 °C of Ta_200)                                                                                                        | <b>-0.81</b> | 0.14         | -0.27        |
| DTR (Diurnal Temperature Range) of Ta_200                                                                                                 | <b>0.45</b>  | <b>-0.46</b> | <b>0.61</b>  |
| GDD (Growing Degree Days) ([mean of Ta_200_min and Ta_200_max] - 10 °C, with Ta_200_min and Ta_200_max capped to range of 10 °C to 30 °C) | <b>0.95</b>  | -0.13        | 0.12         |
| Heat index based on Ta_200 and rH_200                                                                                                     | <b>0.62</b>  | <b>0.41</b>  | 0.26         |
| Humidex based on Ta_200 and rH_200                                                                                                        | <b>0.63</b>  | <b>0.48</b>  | 0.25         |
| Ice days Tmax < 0 °C of Ta_200                                                                                                            | <b>-0.76</b> | -0.09        | -0.04        |
| Maximum value of Ta_200                                                                                                                   | <b>0.75</b>  | <b>-0.45</b> | <b>0.29</b>  |
| Minimum value of Ta_200                                                                                                                   | <b>0.77</b>  | 0.21         | <b>-0.30</b> |
| Summer-Simmer-Index based on Ta_200 and rH_200                                                                                            | <b>0.60</b>  | <b>0.44</b>  | 0.23         |
| Summer days Tmax >= 25 °C of Ta_200                                                                                                       | <b>0.81</b>  | <b>-0.29</b> | 0.25         |
| Tropical days Tmax >= 30 °C of Ta_200                                                                                                     | <b>0.78</b>  | -0.27        | <b>0.30</b>  |
| Tropical nights Tmin >= 20 °C of Ta_200                                                                                                   | <b>0.59</b>  | -0.16        | <b>-0.43</b> |
| Vapor pressure (Arden Buck equation)                                                                                                      | <b>0.96</b>  | -0.03        | 0.00         |
| Warm days Tmax >= 20 °C of Ta_200                                                                                                         | <b>0.88</b>  | -0.21        | 0.22         |
| Soil temperature at 5 cm below surface                                                                                                    | <b>0.86</b>  | -0.14        | -0.05        |
| Soil temperature at 10 cm below surface                                                                                                   | <b>0.87</b>  | -0.13        | -0.06        |
| Soil temperature at 20 cm below surface                                                                                                   | <b>0.83</b>  | -0.04        | -0.01        |
| Soil temperature at 50 cm below surface                                                                                                   | <b>0.75</b>  | -0.20        | -0.09        |
| Relative air humidity at 2 m above ground (rH_200)                                                                                        | -0.08        | <b>0.65</b>  | <b>0.31</b>  |
| Precipitation based on RADOLAN product                                                                                                    | <b>-0.59</b> | <b>-0.54</b> | 0.15         |
| Soil moisture at 10 cm below surface (vegetation period)                                                                                  | <b>-0.79</b> | -0.25        | 0.23         |
| Air temperature 10 cm above surface within the ground vegetation layer (vegetation period)                                                | <b>0.91</b>  | 0.06         | 0.00         |

| Climate variable                                                       | PC1          | PC2          | PC3         |
|------------------------------------------------------------------------|--------------|--------------|-------------|
| Air temperature at 2 m above ground (Ta_200) (vegetation period)       | <b>0.93</b>  | 0.04         | -0.13       |
| Vapour pressure (Arden Buck equation) (vegetation period)              | <b>0.93</b>  | 0.00         | -0.09       |
| Relative air humidity at 2 m above ground (rH_200) (vegetation period) | -0.14        | <b>0.67</b>  | <b>0.46</b> |
| Precipitation based on RADOLAN product (vegetation period)             | <b>-0.63</b> | <b>-0.54</b> | 0.14        |

Vegetation period: mean values over the vegetation period (April to September in each year); in bold: significant correlation after correction for multiple testing
