# Supplementary material
Source: MDPI journal article supplement (https://www.mdpi.com/1999-4907/11/12/1354)
Supplement: s1 [file s1]

**Table S2.** Coefficient of variation (CV) of the populations for plant height increment in the different regions

| Region | Population | CV    |
|--------|------------|-------|
| AEW    | A5         | 0.563 |
| AEW    | A5_09      | 0.602 |
| AEW    | A8         | 0.580 |
| AEW    | H10        | 0.737 |
| AEW    | H10_09     | 0.633 |
| AEW    | H6         | 0.564 |
| AEW    | S5         | 0.692 |
| AEW    | S9         | 0.579 |
| Mean   |            | 0.619 |
| HEW    | A5         | 0.551 |
| HEW    | A5_09      | 0.404 |
| HEW    | A8         | 0.528 |
| HEW    | H10        | 0.533 |
| HEW    | H10_09     | 0.453 |
| HEW    | H6         | 0.660 |
| HEW    | S5         | 0.526 |
| HEW    | S9         | 0.535 |
| Mean   |            | 0.524 |
| SEW    | A5         | 0.656 |
| SEW    | A5_09      | 0.606 |
| SEW    | A8         | 0.617 |
| SEW    | H10        | 0.632 |
| SEW    | H10_09     | 0.570 |
| SEW    | H6         | 0.583 |
| SEW    | S5         | 0.677 |
| SEW    | S9         | 0.565 |
| Mean   |            | 0.613 |
