# Supplementary material
Source: MDPI journal article supplement (https://www.mdpi.com/1999-4907/11/12/1354)
Supplement: s1 [file s1]

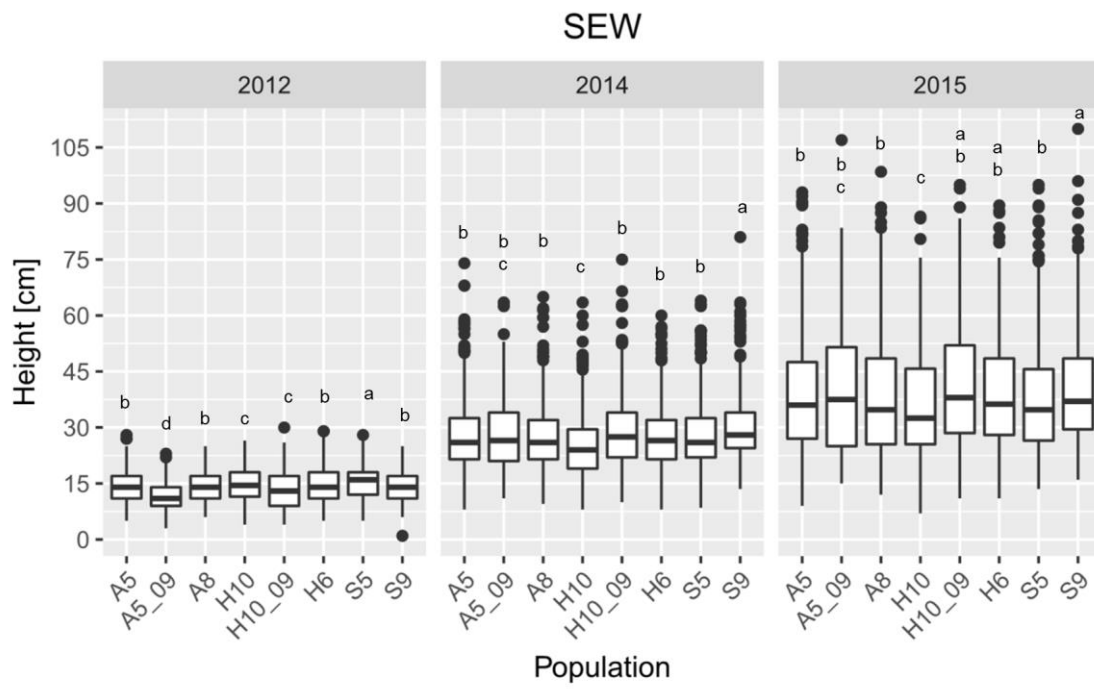

(a)

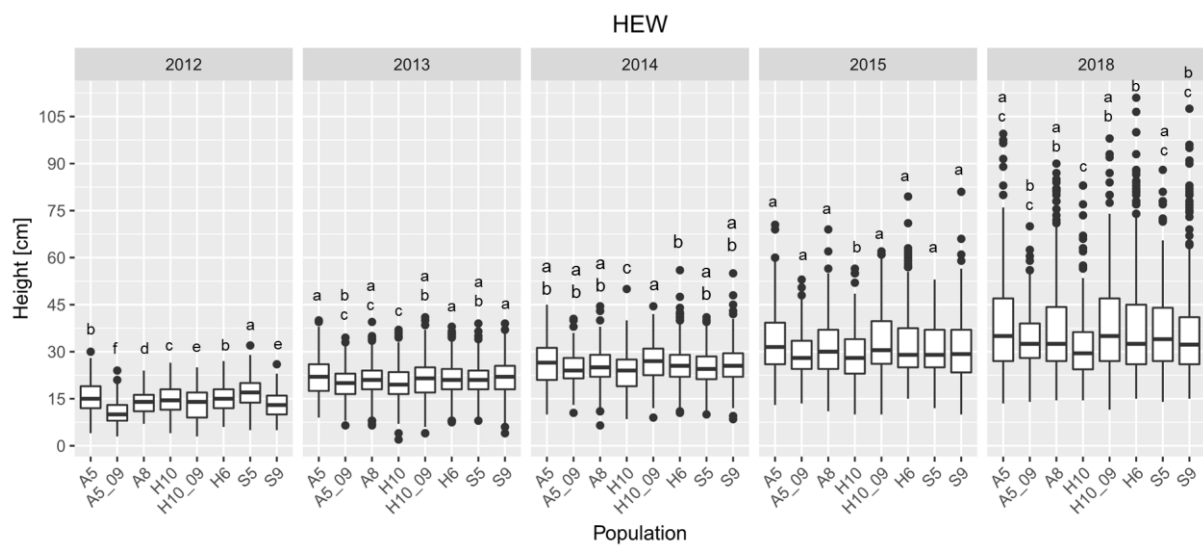

(b)

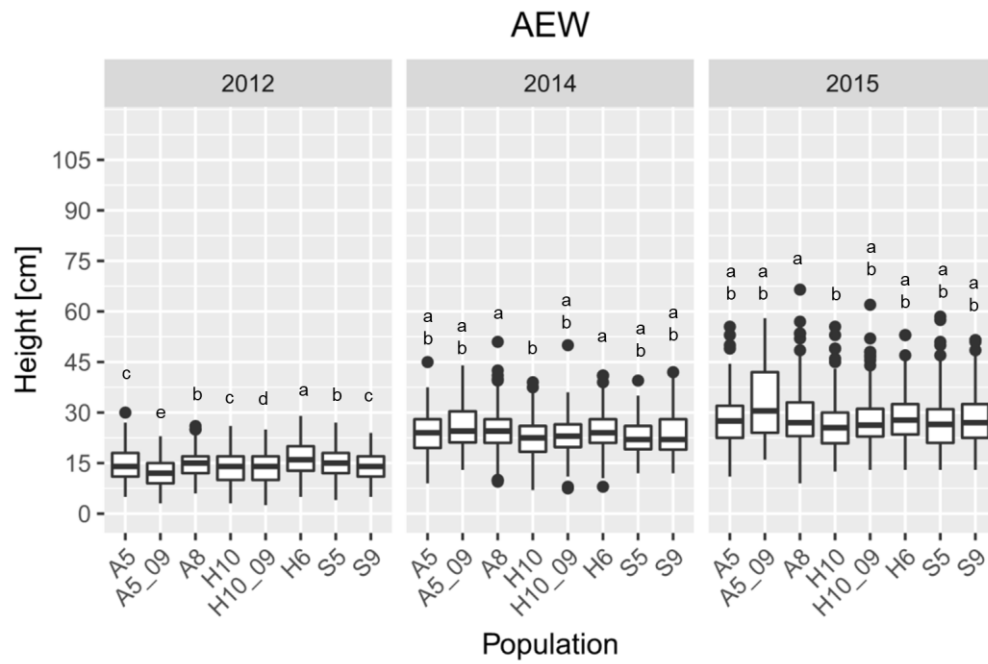

(c)

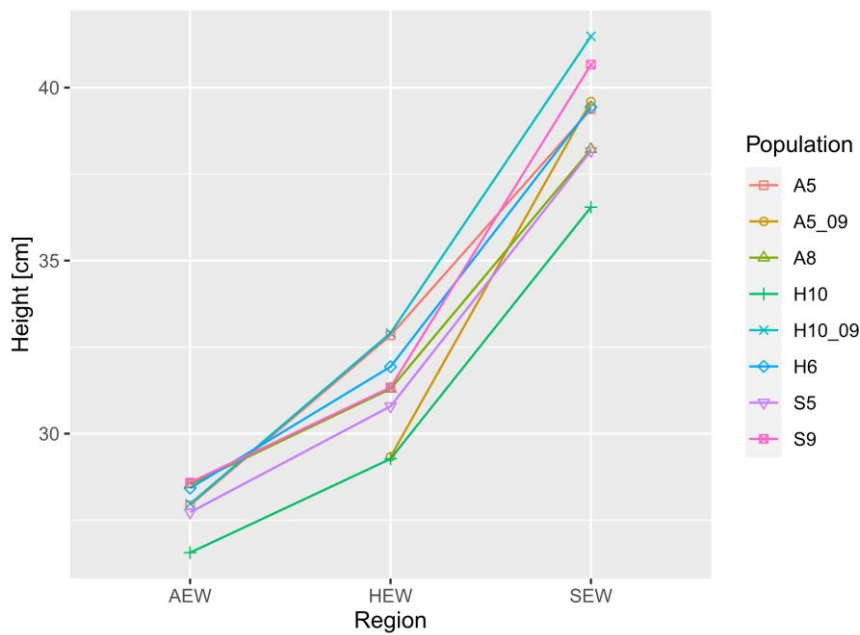

(d)

**Figure S1.** Boxplots of plant height for the population (a) SEW, (b) HEW, and (c) AEW in the different years, and (d) interaction plot of mean plant height in 2015 of the different populations in the three study regions (please note that A5\_09 was removed from AEW in Fig. S1(d), since it is based on approx. half the sample size of the other populations and not significantly different to most populations (see Figs. S1(a-c) for details), but would create the impression of superior plant height in the figure). (Populations from the SEW region: S5 and S9; from HEW: H10, H10\_09, and H6; from AEW: A5, A5\_09, and A8. For the populations H10 and A5, seeds from 2009 were also available for raising seedlings and are named H10\_09 and A5\_09, respectively).
