# Supplementary material
Source: MDPI journal article supplement (https://www.mdpi.com/1999-4907/11/12/1354)
Supplement: s1 [file s1]

Archive with 3 entries (3 files):
- Supplementary_material/FigureS1.pdf
- Supplementary_material/TableS1.pdf
- Supplementary_material/TableS2.pdf
